# Supplementary material
Source: publisher site journal article supplement (https://www.dovepress.com/get_supplementary_file.php?f=244836.docx)
Supplement: Supplementary file 1 [file get_supplementary_file.php]

**Supplementary material**

Table S1. Institutional empiric vancomycin dosing protocols for pediatric patients

| **Pediatric patients**  **Aged >1 month** | | **Vancomycin dose** |
| --- | --- | --- |
| General dose  Enterocolitis  Pneumonia | | 10 mg/kg/dose every 6 hours (40 mg/kg/day) |
| Bacteremia  Bone and join infection  CNS infection | | 15 mg/kg/dose every 6 hours (60 mg/kg/day) |
| **Neonatal patients** | | **Vancomycin dose** |
| **Body weight** | **Postnatal age (PNA)** |
| <1.2 kg | 0-28 days | 15 mg/kg/dose every 18-24 hours (15-20 mg/kg/day) |
| 1.2-2 kg | 0-6 days | 10-15mg/kg/dose every 12-18 hours (13.3-30 mg/kg/day) |
| ≥7 days | 10-15mg/kg/dose every 8-12 hours (20-45 mg/kg/day) |
| >2 kg | 0-6 days | 10-15mg/kg/dose every 8-12 hours (20-45 mg/kg/day) |
| ≥7 days | 10-15mg/kg/dose every 6-8 hours (30-60 mg/kg/day) |

Table S2. Baseline characteristics of overall study patients (N=201)

| **Variables** | **Lower-trough**  **(n=87)** | **Low-trough**  **(n=82)** | **High-trough**  **(n=32)** |
| --- | --- | --- | --- |
| Sex (female), n (%) | 43 (49.4) | 34 (41.5) | 11 (34.4) |
| Age (years), mean±SD  <1 year, n (%)  1-12 years, n (%) | 4.3±3.9  18 (20.7)  69 (79.3) | 4.4±3.8  22 (26.8)  60 (73.2) | 3.7±4.3  17 (53.1)  15 (46.9) |
| ICU hospitalization at vancomycin initiation, n (%) | 27 (31.0) | 28 (34.1) | 17 (53.1) |
| Length of stay at vancomycin initiation (days)  mean±SD  median (IQR) | 12.2±13.2  9 (3-17) | 12.2±16.0  5.5 (1-19) | 12.5±18.5  4 (1-15) |
| Initial total daily dose (mg/kg/day)  mean±SD  median (IQR) | 42.7±15.0  40.0 (37.0-47.9) | 46.0±15.0  40.9 (39.6-52.6) | 56.0±16.2  55.9 (43.8-60.9) |
| Comorbidity, n (%) |  |  |  |
| Pulmonary disease | 33 (37.9) | 43 (52.4) | 14 (43.8) |
| Circulatory system disease | 13 (14.9) | 15 (18.3) | 7 (21.9) |
| Genitourinary disease | 9 (10.3) | 8 (9.8) | 6 (18.8) |
| CCI, mean±SD | 0.4±0.8 | 0.3±0.8 | 0.5±0.9 |
| ≤1, n (%) | 75 (86.2) | 74 (90.2) | 26 (81.3) |
| 2, n (%) | 8 (9.2) | 6 (7.3) | 5 (15.6) |
| ≥3, n (%) | 4 (4.6) | 2 (2.4) | 1 (3.1) |
| SCr (mg/dL), mean±SD | 0.5±0.2 | 0.5±0.3 | 0.7±0.8 |
| CRP (mg/dL), mean±SD | 3.7±5.3 | 4.8±7.6 | 7.9±9.5 |
| Concomitant immunosuppressant or chemotherapy, n (%) | 4 (4.6) | 1 (1.2) | 1 (3.1) |
| Concomitant nephrotoxin, n (%) | 68 (78.2) | 68 (82.9) | 28 (87.5) |
| Number of concomitant  nephrotoxins, median (IQR) | 1 (1-2) | 1 (1-2) | 2 (1-2) |
| Concomitant antimicrobial, n (%) | 59 (67.8) | 57 (69.5) | 30 (93.8) |
| Infectious disease types, n (%) |  |  |  |
| Skin and soft tissue infection | 23 (26.4) | 14 (17.1) | 2 (6.3) |
| Urinary tract infection | 11 (12.6) | 10 (12.2) | 3 (9.4) |
| Pneumonia | 20 (23.0) | 19 (23.2) | 13 (40.6) |
| Bacteremia | 11 (12.6) | 18 (22.0) | 10 (31.3) |
| Resistant Gram positive isolates, n (%) | 44 (50.6) | 33 (40.2) | 16 (50.0) |
| MRSA | 30 (34.5) | 23 (28.0) | 12 (37.5) |
| CoNS | 23 (26.4) | 16 (19.5) | 5 (15.6) |
| Initial steady-state trough (mg/L)  mean±SD  median (IQR) | 3.1±1.1  3.2 (2.2-3.9) | 7.1±1.4  7.0 (5.9-8.1) | 17.8±8.0  14.9 (12.3-20.5) |

Abbreviations: SD: standard deviation; ICU: intensive care unit; IQR: interquartile range; CCI: Charlson comorbidity index; SCr: serum creatinine; CRP: C-reactive protein; MRSA: methicillin-resistant *Staphylococcus aureus*; CoNS: coagulase-negative *Staphylococcus*.
